# Supplementary material for: Coordination ligand exchange of a xanthene probe–Ce(iii) complex for selective fluorescence sensing of inorganic pyrophosphate
Source: Royal Society of Chemistry journal article supplement (doi:10.1039/c3cc48101h), 2013-12-07

Electronic Supplementary Information for  
Coordination Ligand Exchange of a Xanthene Probe-Ce(III) Complex  
for Selective Fluorescence Sensing of Inorganic Pyrophosphate

Ekkachai Kittiloespaisan, Ippei Takashima, Yuji, Kiatpathomchai, Jirarut  
Wongkongkatep\*, and Akio Ojida\*

### Scheme S1

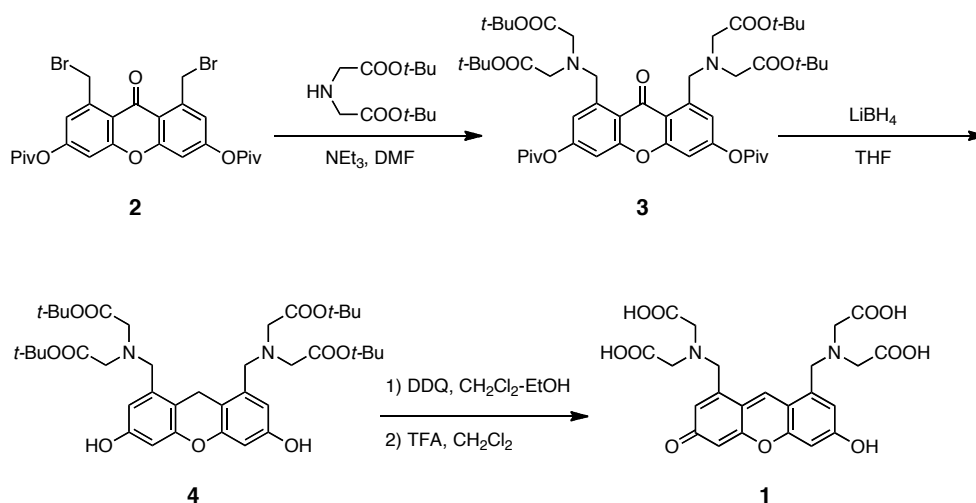

### Synthesis of **3**

To a cooled (0 °C) solution of *tert*-butyl iminodiacetate (1.0 g, 4.08 mmol), TEA (0.125 mL, 0.90 mmol) in anhydrous DMF (10 mL), the crude **2** (485 mg containing 0.29 mmol of **2**) was added, and the mixture was stirred for 3 h at rt. After dilution with AcOEt, the organic layer was washed with saturated NaHCO<sub>3</sub> and brine followed by drying over Na<sub>2</sub>SO<sub>4</sub>. After removal of the solvent in vacuo, the residue was purified by flash column chromatography on silica gel (CHCl<sub>3</sub> / MeOH / NH<sub>3</sub> = 300 / 10 / 1 → 200 / 10 / 1) to give **3** (173 mg, 66%) as a colorless oil. <sup>1</sup>H-NMR (400 MHz, CDCl<sub>3</sub>) δ 1.38 (18H, s), 1.46 (36H, s), 3.49 (8H, s), 4.60 (4H, s), 7.07 (2H, d, *J* = 2.4 Hz), 7.60 (2H, d, *J* = 2.0 Hz). <sup>13</sup>C-NMR (126 MHz, CDCl<sub>3</sub>) δ 179.1, 176.2, 157.3, 155.0, 145.7, 129.8, 128.4, 118.6, 117.7, 108.7, 80.9, 57.1, 56.2, 28.2, 27.1. IR (KBr) 2978, 1736, 1605, 1420, 1366, 1265, 1141, 1103 cm<sup>-1</sup>. ESI-HRMS *m/e* calcd for C<sub>49</sub>H<sub>71</sub>N<sub>2</sub>O<sub>14</sub> [M+H]<sup>+</sup> = 911.4900, observed 911.4906. The purity of **3** was confirmed by HPLC (> 90%, UV absorbance 220 nm).

### Synthesis of **4**

A solution of **3** (83 mg, 91 μmol) in dry THF (5 mL) was added dropwise to a suspension of LiBH<sub>4</sub> (~ 50 mg) in THF at rt. The mixture was stirred at rt for 30 min. After cooling to 0 °C, the solution was acidified to pH 7 with 1N HCl. The mixture was extracted with AcOEt, and washed with saturated NaHCO<sub>3</sub> and brine followed by drying over Na<sub>2</sub>SO<sub>4</sub>. After removal of the solvent in vacuo, the residue was purified

by flash column chromatography on silica gel ( $\text{CHCl}_3$  /  $\text{MeOH}$  /  $\text{NH}_3$  = 200 / 10 / 1) to give **4** (42.7 mg, 64%) as a pale yellow solid.  $^1\text{H}$ -NMR (400MHz,  $\text{CD}_3\text{OD}$ )  $\delta$  1.45 (36H, s), 3.43 (8H, s), 3.89 (4H, s), 3.98 (2H, s), 6.40 (2H, d,  $J$  = 2.4 Hz), 6.65 (2H, d,  $J$  = 2.4 Hz).  $^{13}\text{C}$ -NMR (126 MHz,  $\text{CD}_3\text{OD}$ )  $\delta$  172.3, 157.2, 153.6, 139.1, 113.5, 113.1, 103.1, 82.1, 57.1, 56.1, 28.5, 22.2. IR (KBr) 3418, 2978, 1728, 1450, 1366, 1149  $\text{cm}^{-1}$ . MALDI-TOF-MS (CHCA, Linear, positive)  $m/e$  calcd for  $\text{C}_{39}\text{H}_{57}\text{N}_2\text{O}_{11}$   $[\text{M}+\text{H}]^+ = 729.3957$ , observed 729.3952. The purity of **3** was confirmed by HPLC (> 97%, UV absorbance 220 nm).

### Synthesis of compound **1**

A solution of DDQ (2,3-dichloro-5,6-dicyano-1,4-benzoquinone, 14.0 mg, 61.6  $\mu\text{mol}$ ) in dry EtOH (3 ml) was added dropwise to a solution of **4** (46.0 mg, 63.1  $\mu\text{mol}$ ) in dry  $\text{CH}_2\text{Cl}_2$  (4 mL) and dry EtOH (2 ml). The solution was stirred for 30 min at rt. After removal of the solvent in vacuo, the residue was purified by flash column chromatography on silica gel ( $\text{CHCl}_3$  /  $\text{MeOH}$  = 20 / 1). The obtained solid was washed with isopropyl ether. The residue was dissolved in dry  $\text{CH}_2\text{Cl}_2$  (4 mL) and TFA (3 mL) was added. The solution was stirred for 6 h at rt. After removal of the solvent in vacuo, the residue was dissolved in  $\text{CHCl}_3$  and evaporated (the procedure was repeated twice). The residue was purified by HPLC (column ; YMC-Pack, ODS-A, 250 $\times$ 10 mm,  $\text{CH}_3\text{CN}$  / Water (0.1 % TFA) = 13/87 (35 min)) to give **1** (12.8 mg, 40 %) as an orange solid. The purity of **1** was confirmed by HPLC (> 98%, UV absorbance 220 nm).  $^1\text{H}$ -NMR (400 MHz,  $\text{DMSO}-d_6$ )  $\delta$  3.48 (8H, s), 4.26 (4H, s), 6.84 (2H, s), 7.00 (2H, s), 9.94 (1H, s).  $^{13}\text{C}$ -NMR (126 MHz,  $\text{DMSO}-d_6$ )  $\delta$  172.2, 172.1, 172.0, 157.5, 156.1, 152.8, 141.0, 102.1, 54.1, 53.6. IR (KBr) 3017, 1728, 1612, 1397, 1265, 1195  $\text{cm}^{-1}$ . FAB-HRMS (triethanolamine)  $m/e$  calcd for  $\text{C}_{23}\text{H}_{21}\text{N}_2\text{O}_{11}$   $[\text{M}-\text{H}]^- = 501.1145$ , observed 501.1146.

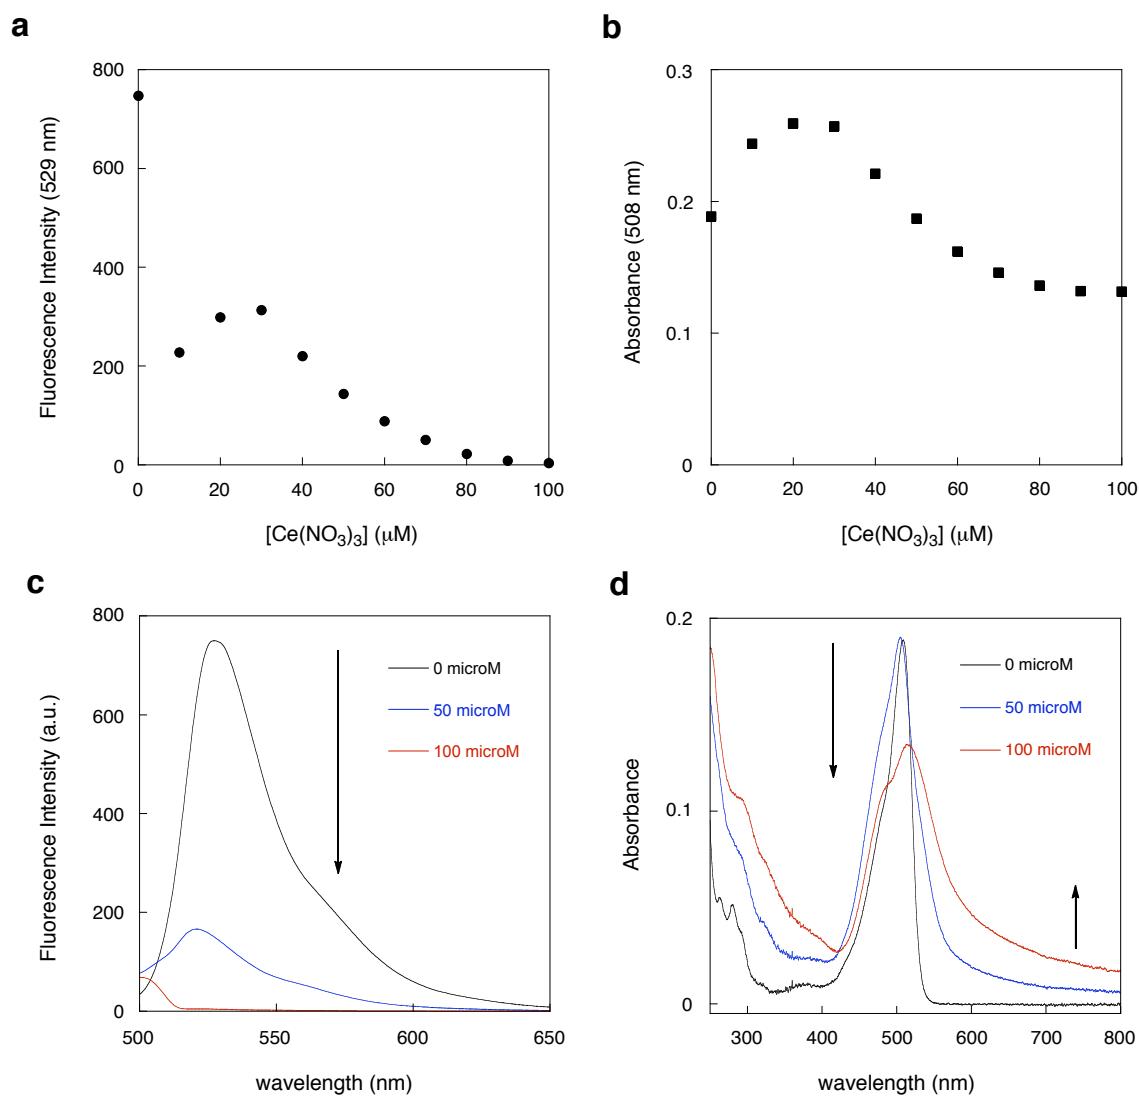

**Fig. S1** UV absorbance (a, c) and fluorescence (b, d) spectral change of **1** upon addition of  $\text{Ce}(\text{NO}_3)_3$ . Conditions:  $[\mathbf{1}] = 5 \mu\text{M}$ , 25 mM MES (pH 6.8)-MeOH (1 : 1), 25 °C,  $\lambda_{\text{ex}} = 500 \text{ nm}$ .

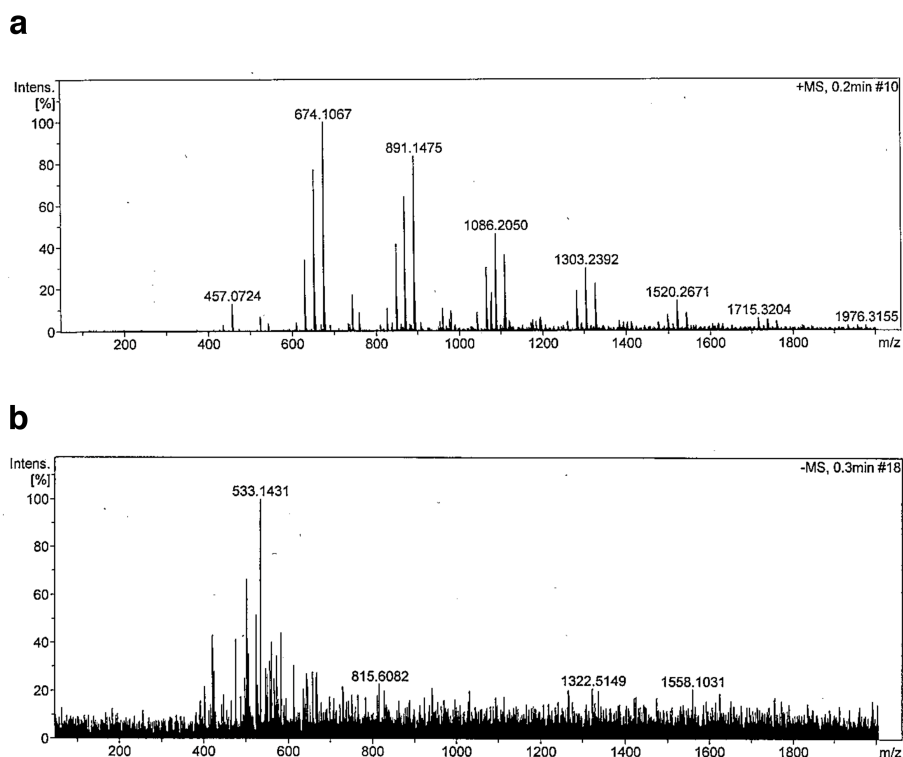

**Fig. S2** ESI spectra of **1**-Ce(III) complex in the absence (a) and presence (b) of PPI.

### Fluorescence Measurement

Fluorescence spectra were recorded on a Perkin-Elmer LS55 spectrometer. A solution (3 mL) of **1** (5  $\mu$ M) and Ce(NO<sub>3</sub>)<sub>3</sub> (100  $\mu$ M) in 25 mM MES (pH 6.8)-MeOH (1 : 1) was stirred for 1 h at rt in a quartz cell. The titration experiments (Figure 2 and 3) were carried out at 25 °C using this solution. The fluorescence emission spectral change (excitation wavelength  $\lambda_{ex}$  = 500 nm) was monitored at 1~3 min later after addition of aqueous anion solution, at which time the fluorescence change completed and the solution reached an equilibrium state. The aqueous anion solution was freshly prepared before the titration and added to the cell with a micro syringe. Abbreviations of the analytes listed in Figure 3 are as follows; PPI = inorganic pyrophosphate, ATP = adenosine-5'-triphosphate, GTP = guanosine-5'-triphosphate, CTP = cytidine-5'-triphosphate, UDP = uridine-5'-diphosphate, ADP = adenosine-5'-diphosphate, AMP = adenosine-5'-monophosphate, cAMP = adenosine-3',5'-cyclic monophosphate, Pi = inorganic phosphate, NaHCO<sub>3</sub> = sodium bicarbonate, AcONa = sodium acetate Na<sub>2</sub>SO<sub>4</sub> = sodium sulfate, K<sub>2</sub>S<sub>2</sub>O<sub>7</sub> = potassium pyrosulfate.

### Fluorescent LAMP assay

The fluorescent LAMP assay was performed using the serially diluted samples of WSSV recombinant plasmid (0, 2, 20, 200, and 1000 copies). The amplification reaction was conducted at 63 °C for 30 min under the reaction conditions shown in Table S1. After reaction termination at 92 °C for 2 min, 100 μL of the reaction mixture was added to the solution of **1**-Ce(III) complex (100 μL containing 15 mM of **1**, 270 mM Ce(NO<sub>3</sub>)<sub>3</sub>, pH 6.8, 25 °C in 25 mM MES (pH 6.8)-MeOH (1 : 1)). Fluorescence intensity of each sample was measured by microplate reader (EnSpire, Perkin-Elmer).

Table S1. Conditions of the fluorescent LAMP assay

| Component                                 | Final concentration |
|-------------------------------------------|---------------------|
| inner primers (FIP and BIP) <sup>a</sup>  | 2 μM (each)         |
| loop primers (LF and LB) <sup>a</sup>     | 2 μM (each)         |
| outer primers (F3 and B3) <sup>a</sup>    | 0.2 μM (each)       |
| betaine                                   | 0.4 M               |
| dNTP mix                                  | 0.5 mM              |
| MgSO <sub>4</sub>                         | 2 mM                |
| <i>Bst</i> DNA polymerase                 | 0.32 μU             |
| <i>Bst</i> DNA polymerase supplied buffer | 1x                  |

<sup>a</sup>Sequence of the primer was reported in the previous manuscript.<sup>S1</sup>

### References

S1. E. Kittiloespaisan, A. Ojida, I. Hamachi, Y. S. etang-Nun, W. Kiatpathomchai, J. Wongkongkatep, *Chem. Lett.*, **2012**, *41*, 1666.

<sup>1</sup>H-NMR of Compound 3

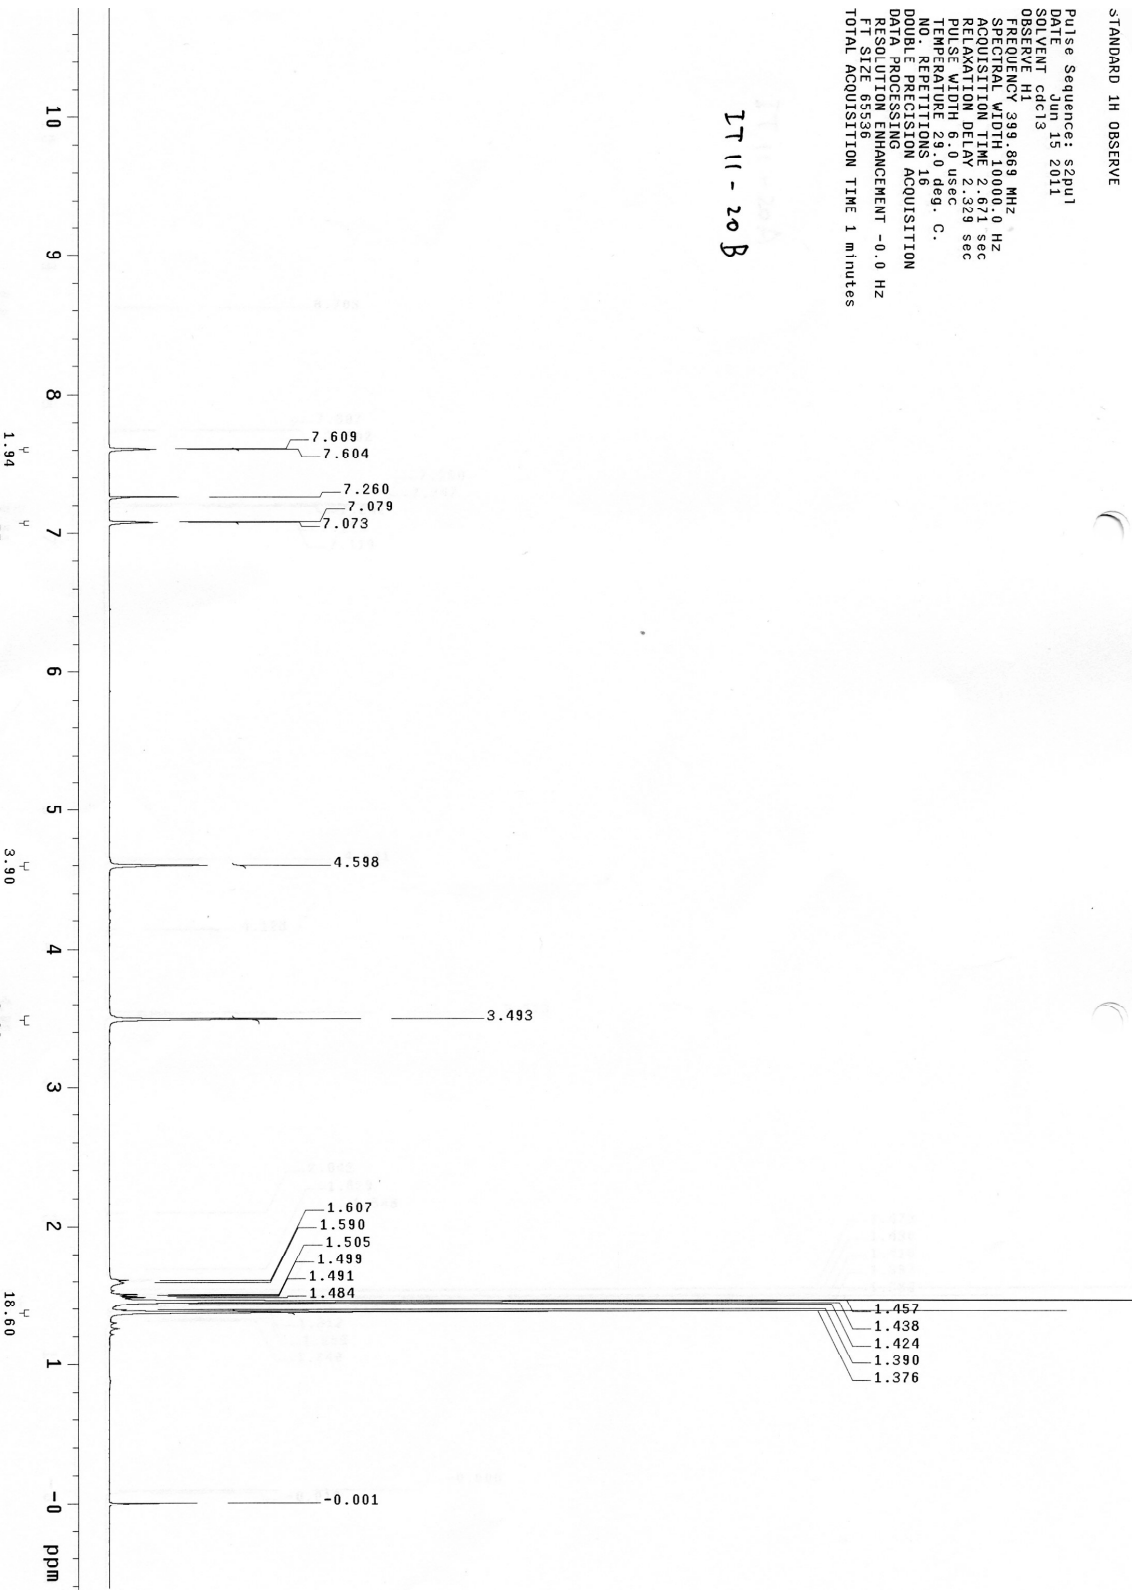

<sup>13</sup>C-NMR of Compound 3

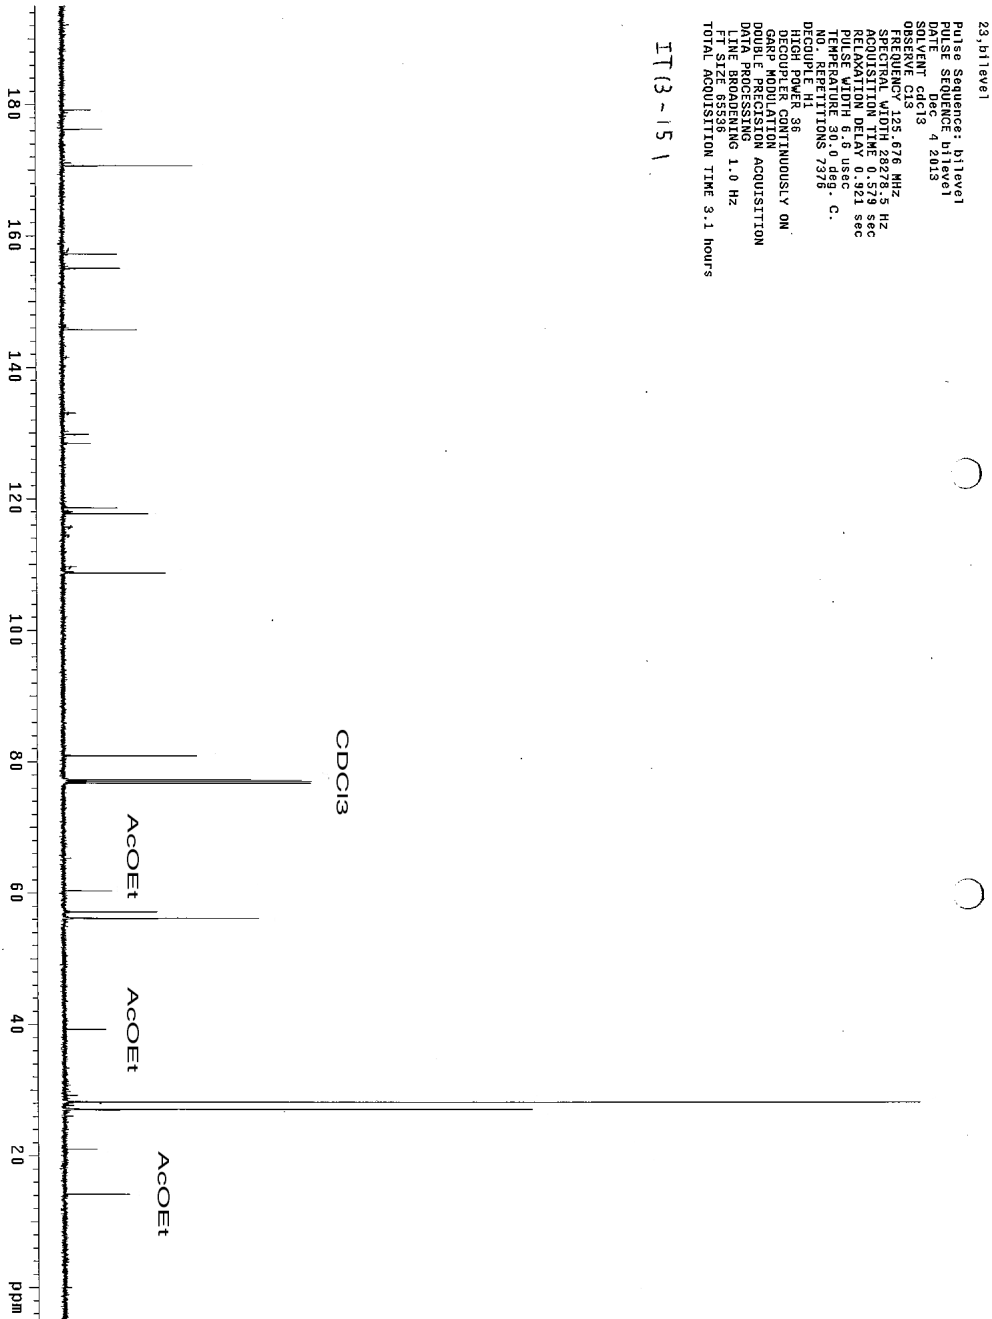



ESI-HRMS of Compound 3

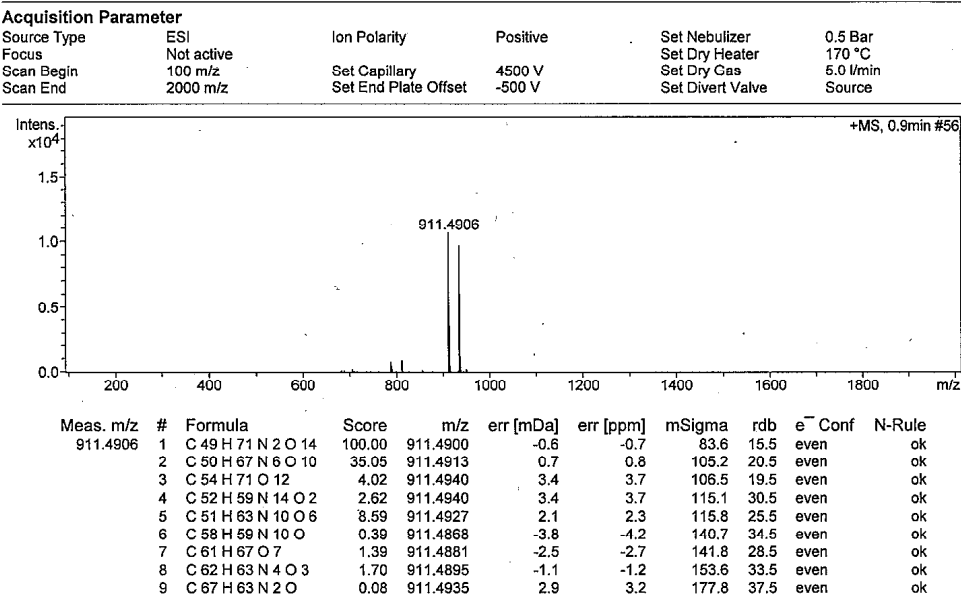

HPLC of Compound 3

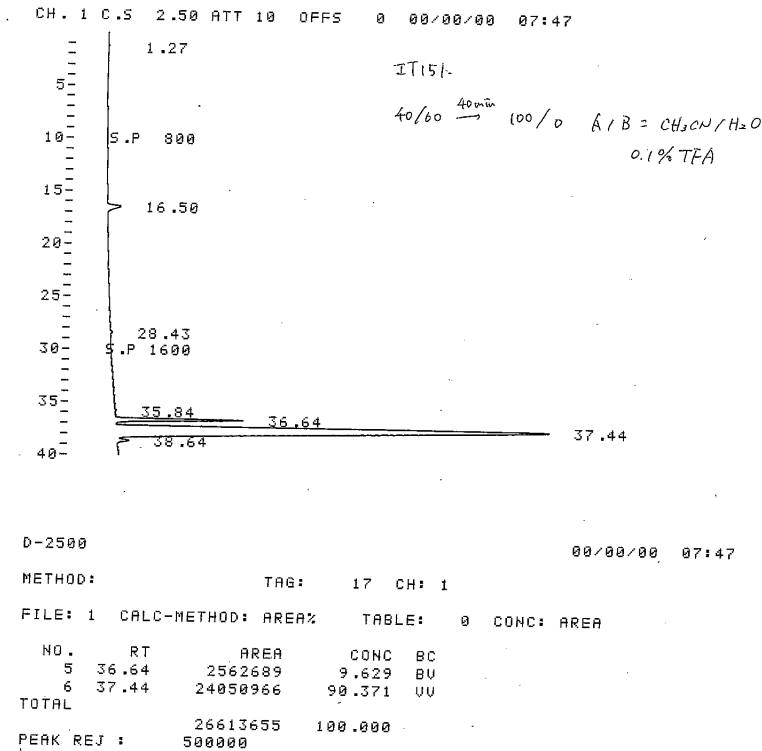



<sup>13</sup>C-NMR of Compound 4

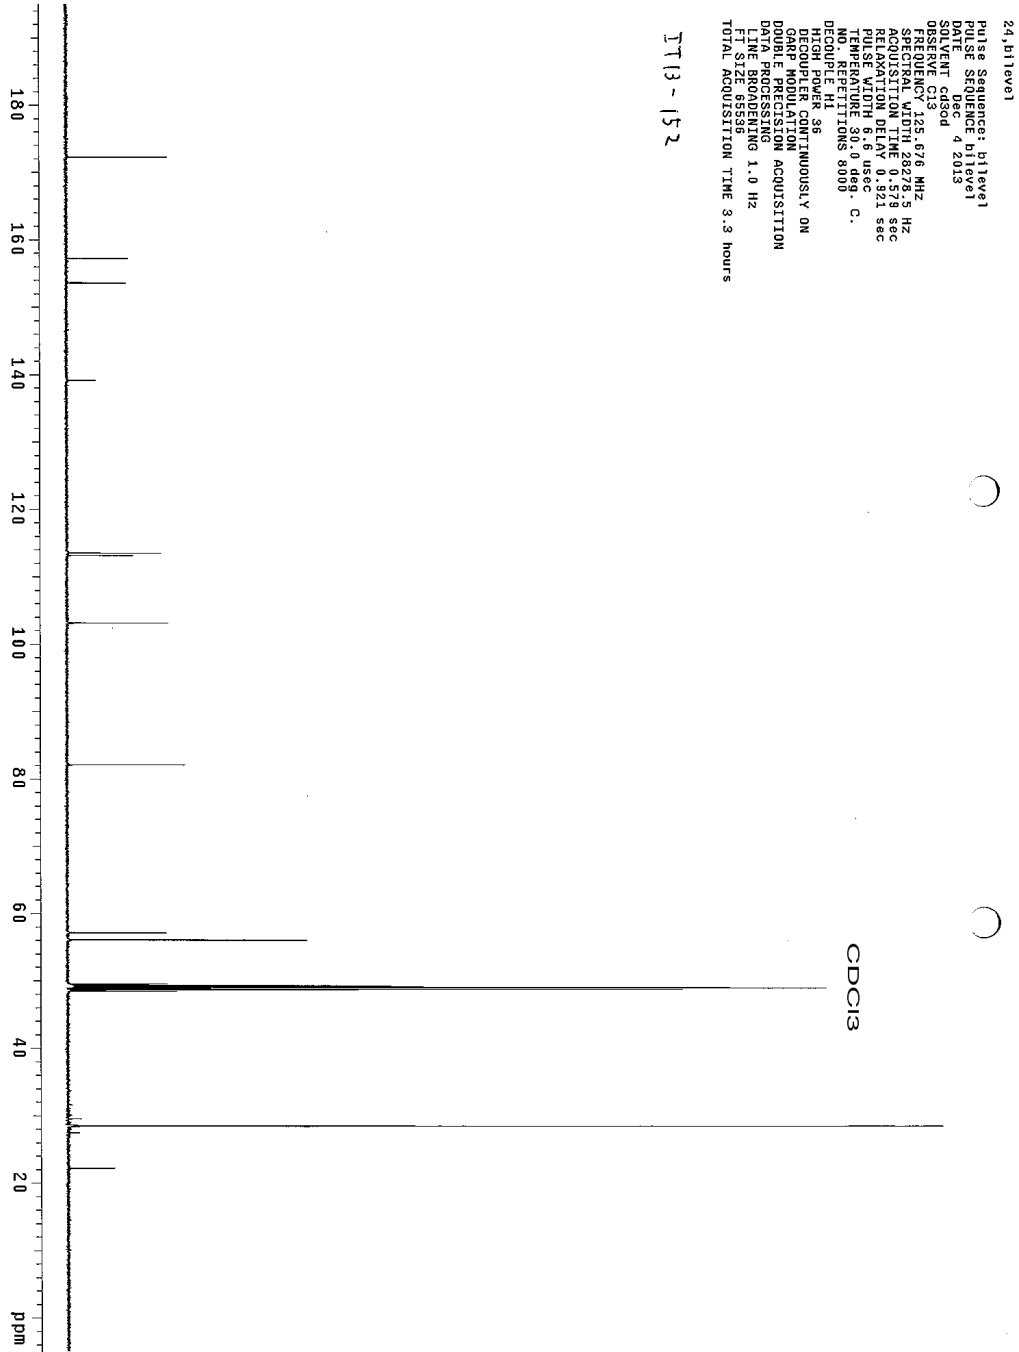

ESI-HRMS of Compound 4

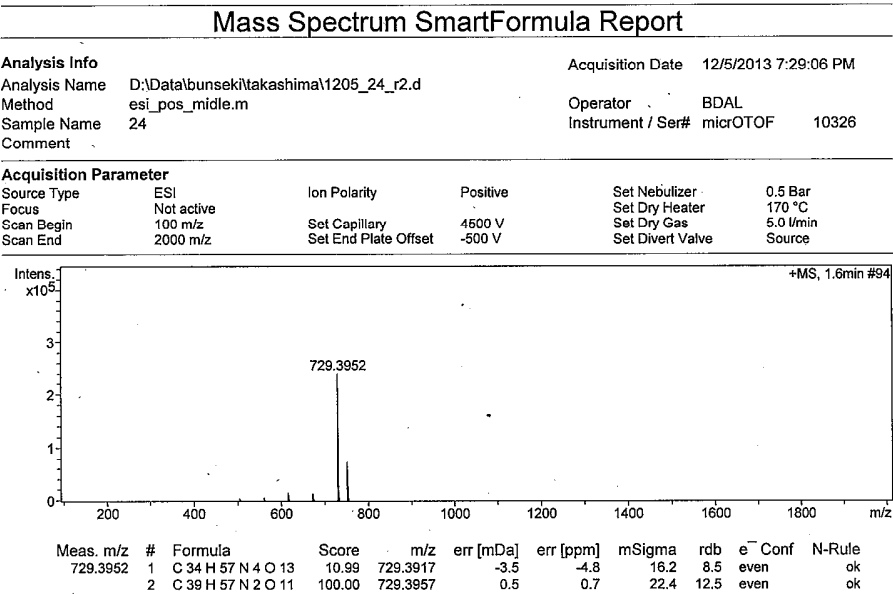

HPLC of Compound 4

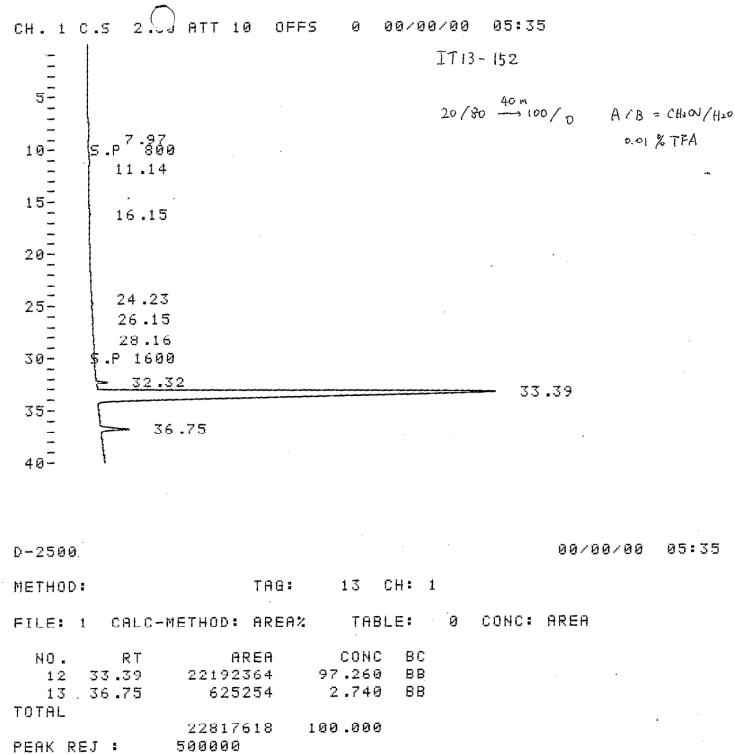





FAB-HRMS of Compound 1

[ Theoretical Ion Distribution ]  
Molecular Formula : C23 H21 O11 N2  
Base Peak : 501.1145, Averaged MW : 501.4265, U.S. 14.5)  
m/z 501.1145, 501.4271(a), 501.4278(w)

Page: 1

| m/z      | INT.     |
|----------|----------|
| 501.1145 | 100.0000 |
| 502.1178 | 27.0501  |
| 503.1201 | 5.7201   |
| 504.1227 | 0.8877   |
| 505.1251 | 0.1168   |
| 506.1276 | 0.0132   |
| 507.1300 | 0.0013   |
| 508.1324 | 0.0001   |

[ Elemental Composition ]  
Data : 12oct11-NAKAZON0002  
Sample: 67B  
Note : H 2 O/MeOH + TEA  
Inlet : Direct  
RT : 0.00 min  
Elements : C 100/0, H 100/0, O 15/0, N 5/0  
Mass Tolerance : 20mmu  
Unsaturation (U.S.) : 0.0 - 500.0

Date : 12-Oct-11 11:44  
ref.PEG600  
Ion Mode : FAB-  
Scan# : 1  
N 5/0

Page: 1

| Observed m/z | Int. | Err.(ppm / mmu) | U.S. Composition        |
|--------------|------|-----------------|-------------------------|
| 501.1146     | 48.6 | -26.6 / -13.3   | 31.5 C 39 H 17 O        |
|              |      | +3.9 / +1.9     | 27.5 C 35 H 17 O 4      |
|              |      | -38.3 / -19.2   | 22.5 C 32 H 21 O 6      |
|              |      | +34.3 / +17.2   | 23.5 C 31 H 17 O 7      |
|              |      | -7.8 / -3.9     | 18.5 C 28 H 21 O 9      |
|              |      | +22.6 / +11.3   | 14.5 C 24 H 21 O 12     |
|              |      | -19.6 / -9.8    | 9.5 C 21 H 25 O 14      |
|              |      | -1.5 / -0.7     | 32.0 C 38 H 15 O N      |
|              |      | +29.0 / +14.5   | 28.0 C 34 H 15 O 4 N    |
|              |      | -13.2 / -6.6    | 23.0 C 31 H 19 O 6 N    |
|              |      | +17.2 / +8.6    | 19.0 C 27 H 19 O 9 N    |
|              |      | -24.9 / -12.5   | 14.0 C 24 H 23 O 11 N   |
|              |      | +5.5 / +2.8     | 10.0 C 20 H 23 O 14 N   |
|              |      | +23.6 / +11.8   | 32.5 C 37 H 13 O N 2    |
|              |      | -18.5 / -9.3    | 27.5 C 34 H 17 O 3 N 2  |
|              |      | +11.9 / +6.0    | 23.5 C 30 H 17 O 6 N 2  |
|              |      | -30.1 / -15.2   | 18.5 C 27 H 21 O 8 N 2  |
|              |      | +0.2 / +0.1     | 14.5 C 23 H 21 O 11 N 2 |
|              |      | +30.6 / +15.3   | 10.5 C 19 H 21 O 14 N 2 |
|              |      | -31.9 / -15.0   | 32.0 C 37 H 15 N 3      |
|              |      | +6.6 / +3.3     | 28.0 C 33 H 15 O 3 N 3  |
|              |      | -35.6 / -17.8   | 23.0 C 30 H 19 O 5 N 3  |
|              |      | +37.0 / +18.5   | 24.0 C 29 H 15 O 6 N 3  |
|              |      | -5.2 / -2.6     | 19.0 C 26 H 19 O 8 N 3  |
|              |      | +25.3 / +12.7   | 15.0 C 22 H 19 O 11 N 3 |
|              |      | -16.9 / -8.5    | 10.0 C 19 H 23 O 13 N 3 |
|              |      | +1.2 / +0.6     | 32.5 C 36 H 13 N 4      |
|              |      | +31.6 / +15.9   | 28.5 C 32 H 13 O 3 N 4  |
|              |      | -10.5 / -5.3    | 23.5 C 29 H 17 O 5 N 4  |
|              |      | +19.9 / +10.0   | 19.5 C 25 H 17 O 8 N 4  |
|              |      | -22.2 / -11.1   | 14.5 C 22 H 21 O 10 N 4 |
|              |      | +8.2 / +4.1     | 10.5 C 18 H 21 O 13 N 4 |
|              |      | -34.0 / -17.0   | 5.5 C 15 H 25 O 15 N 4  |
|              |      | +26.3 / +13.2   | 33.0 C 35 H 11 N 5      |
|              |      | -15.9 / -8.0    | 28.0 C 32 H 15 O 2 N 5  |
|              |      | +14.6 / +7.3    | 24.0 C 28 H 15 O 5 N 5  |
|              |      | -27.6 / -13.8   | 19.0 C 25 H 19 O 7 N 5  |
|              |      | +2.9 / +1.4     | 15.0 C 21 H 19 O 10 N 5 |
|              |      | -33.3 / -15.7   | 10.0 C 18 H 23 O 12 N 5 |
|              |      | +33.3 / +16.7   | 11.0 C 17 H 19 O 13 N 5 |
|              |      | -8.9 / -4.4     | 6.0 C 14 H 23 O 15 N 5  |

HPLC of Compound 1

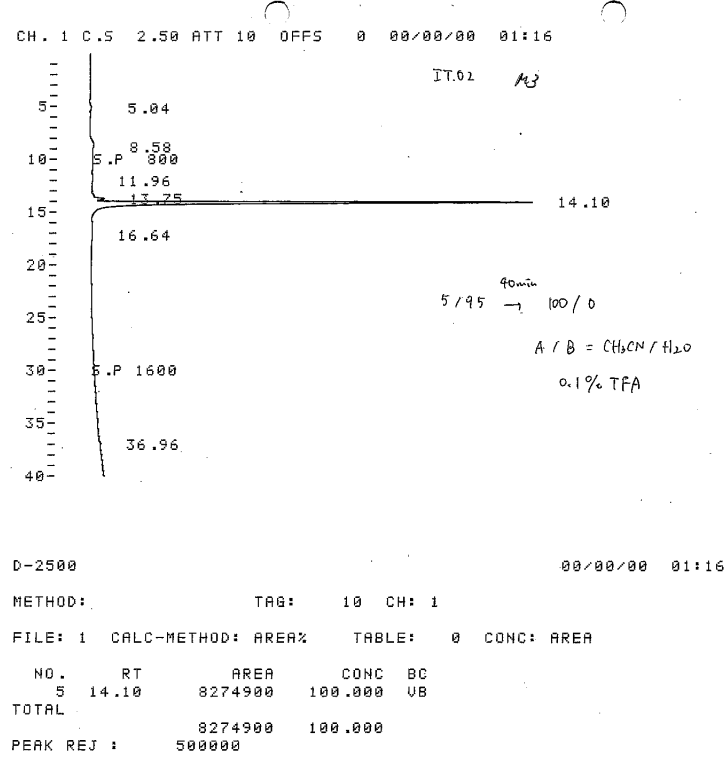

Supplement: c3cc48101h.pdf [file c3cc48101h.pdf]
